# Supplementary material
Source: Springer Nature journal article supplement (https://www.springermedizin.de/resource/supplementary/12936_2013_3155_MOESM5_ESM.pdf/9546328)

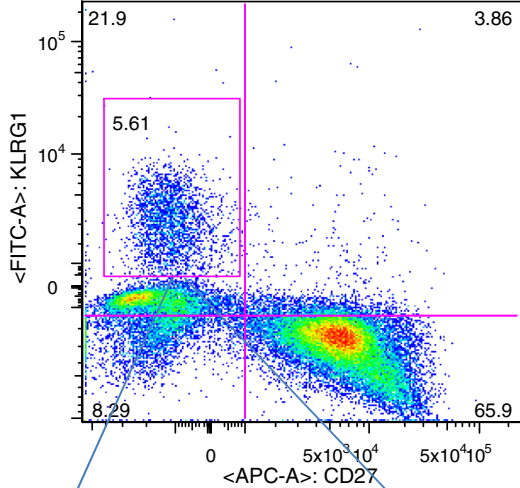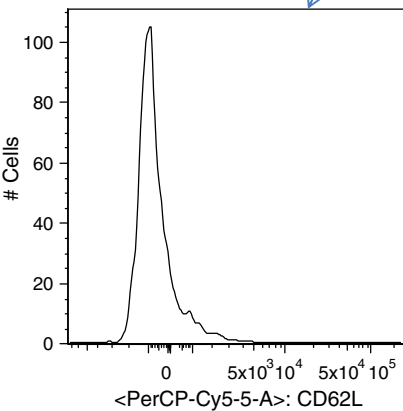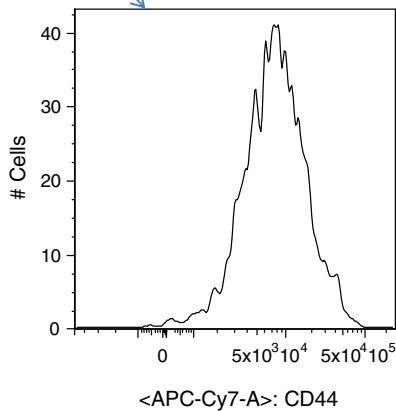

Supplement: MOESM5 [file 9546328]
